# Supplementary material for: Dynamic Infrared Thermography of Nanoheaters Embedded in Skin-Equivalent Phantoms
Source: Hindawi journal article supplement (doi:10.1155/2018/3847348), 2018-01-01
Supplement: f1 [file 3847348.f1.docx]

Figure SI-1. Histograms of diameters and frequency distribution data of populations of a) 200 AuNSs for 16-AuNSs and b) 100 for 18-AuNSs.

Figure SI-2. The increase of the molar concentration of HEPES promotes strong anisotropic formation of the MB-AuNPs. The UV-Vis spectra compares the SPR band of MB-AuNPs synthetized without hydroxylamine and with an increment of concentration of HEPES, it can be observed that the SPR band shifts to the infrared (compare HEPES 25, 50 and 75 mM in the 600-800 nm region). During the reaction, nitrogen species results from HEPES degradation, as can be seen in the spectra at 346 nm. After the use of hydroxylamine (black line), can be observed in this same spectra region that there is not degradation of HEPES, and a better optical response is obtained. Thus the role of HEPES is to promote the anisotropic formation while hydroxylamine is dedicated to the reduction of Au3+ salt ions.

Figure SI-3. Scanning electron microscopy micrograph of 16MB-AuNPs, it can be observed the monodispersity and non-agglomeration of the NPs.

Figure SI-4. Diagram of the concentrations of reactants used for the samples analyzed.

Figure SI-5. Histograms of diameters and frequency distribution data of populations of 50 16MB-AuNPs.

Figure SI-6. SEM micrographs of MB-AuNPs synthesized in a medium of HEPES [50mM], with a molar ratio Au3+/NH2OH of 1:3, with a) 16-AuNSs and b-c) 18-AuNSs. The difference between sample b) and the 16MB-AuNPs is the size of the AuNSs and with sample a,c) is the addition of double amount of gold ions. The sample a) does not present increment in length peaks.

Figure SI-7. Thermography of skin-equivalent phantom used as control. The thermography was extracted from the video at 200 s after light irradiation starts. It can be observed that the incident light transmits energy to the adjacent regions, but in small area and with not strong gradient temperature.
